# Supplementary material for: Genome-wide transcript expression analysis reveals major chickpea and lentil genes associated with plant branching
Source: Frontiers journal article supplement (doi:10.3389/fpls.2024.1384237), 2024-06-19
Supplement: Table_3.XLSX [file Table_3.XLSX]

## Sheet: Suppl. File S3
Supplemental File S3. Significantly enriched GO terms of differentially expressed genes (DEGs) between two different chickpea and lentil genotypes and tissues. Only DEGs with a FDR < 0.05 and a LogFC less than -2 or greater than 2 were used.
BX: Blanco lechoso axillary bud, BA: Blanco lechoso apical bud, FX: FLIP07-318C axillary bud, FA: FLIP07-318C apical bud.
CsX: Castellana axillary bud, CsA: Castellana apical bud, CmX: Campisi axillary bud, and CmA: Campisi apical bud.

## Sheet: BX vs BA
BX vs BA
Gene regulation	Cluster	Category	Enrichment Score	P-value
upregulated	1	Transcription regulatory region sequence-specific DNA binding	1.51	1.8E-3
		Sequence-specific DNA binding		2.4E-3
		Regulation of transcription, DNA-templated		3.4E-3
		Transcription factor activity, sequence-specific DNA binding		1.0E-2
	2	Dioxygenase	1.49	9.7E-3
		Oxidoreductase		4.6E-2
	3	Signal	1.34	3.4E-2
		Disulfide bond		4.9E-2
	4	Non-haem dioxygenase N-terminal domain	1.22	3.5E-2
		Isopenicillin N synthase-like		4.2E-2
		DOMAIN:Fe2OG dioxygenase		4.4E-2
	5	DOMAIN:NAC	1.15	3.7E-2
	6	Plant-type cell wall	1.11	1.2E-2
		DOMAIN:Peptidase A1		1.5E-2
		Aspartic-type endopeptidase activity		2.4E-2
		Aspartic peptidase		3.5E-2
downregulated	no	no	no	no

## Sheet: FX vs FA
FX vs FA
Gene regulation	Cluster	Category	Enrichment Score	P-value
upregulated	1	Transmembrane helix	5.81	1.1E-8
		Transmembrane		2.7E-7
		Integral component of membrane		2.8E-6
		TRANSMEM:Helical		5.0E-6
		Membrane		2.2E-4
	2	Oxidoreductase activity	5.42	4.6E-7
		Non-haem dioxygenase N-terminal domain		7.5E-7
		DOMAIN:Fe2OG dioxygenase		1.7E-6
		Oxoglutarate/iron-dependent dioxygenase		2.5E-6
		Isopenicillin N synthase-like		2.6E-6
		Dioxygenase activity		8.8E-4
	3	Oxidoreductase	4.7	2.8E-10
		Iron		3.6E-8
		Heme binding		2.2E-6
		BINDING:axial binding residue		1.8E-5
		Heme		2.4E-5
		Cytochrome P450, conserved site		5.1E-5
		Cytochrome P450, E-class, group I		5.7E-5
		Cytochrome P450		6.2E-5
		Oxidoreductase activity, acting on paired donors, with incorporation or reduction of molecular oxygen, NAD(P)H as one donor, and incorporation of one atom of oxygen		9.5E-5
		Monooxygenase activity		5.1E-4
		Iron ion binding		6.1E-4
		Monooxygenase		7.2E-4
		Oxidoreductase activity, acting on paired donors, with incorporation or reduction of molecular oxygen		2.1E-3
	4	DOMAIN:EamA 1	3.65	1.7E-5
		DOMAIN:EamA 2		1.7E-5
		Drug/metabolite transporter		1.3E-4
		DOMAIN:EamA		3.1E-3
		Transmembrane transporter activity		5.0E-3
	5	Diterpenoid biosynthesis	3.26	8.5E-5
		Gibberellin biosynthetic process		2.2E-4
		Dioxygenase activity		8.8E-4
		Gibberellic acid mediated signaling pathway		5.6E-3
	6	DOMAIN:Amino acid transporter transmembrane	3.26	2.5E-5
		Amino acid transporter, transmembrane		9.4E-5
		Amino acid transport		2.9E-4
		Amino-acid transport		4.1E-4
		Amino acid transmembrane transporter activity		7.7E-4
	7	Nitrate assimilation	2.42	1.5E-4
		Nitrate assimilation		5.0E-4
		Nitrate transport		4.9E-2
	8	Galactose metabolism	2.27	1.7E-3
		Raffinose synthase		9.6E-3
		Galactinol-sucrose galactosyltransferase activity		9.9E-3
	9	CARBOHYD:N-linked (GlcNAc...) asparagine	2.13	4.2E-5
		Glycoprotein		4.5E-2
	10	Gibberellic acid mediated signaling pathway	1.51	5.6E-3
	11	GroES-like	1.37	1.5E-2
		Alcohol dehydrogenase, C-terminal		3.0E-2
	12	Aspartic-type endopeptidase activity	1.36	1.4E-2
		DOMAIN:Peptidase A1		2.1E-2
		Peptidase A1		3.1E-2
	13	Thylakoid	1.29	6.8E-3
	14	Oxylipin biosynthetic process	1.27	4.0E-4
		Oxidoreductase activity, acting on single donors with incorporation of molecular oxygen, incorporation of two atoms of oxygen		6.3E-4
		Oxylipin biosynthesis		4.3E-3
	15	DOMAIN:WRKY	1.22	4.7E-2
		WRKY		4.8E-2
	16	DOMAIN:Trichome birefringence-like N-terminal	1.19	2.6E-2
		MOTIF:DCXHWCLPGXXDXWN motif		4.2E-2
	17	Cation transport	1.13	1.2E-2
		DOMAIN:Sodium/calcium exchanger membrane region		3.6E-2
	19	RING	1.04	7.8E-4
		ZN_FING:RING-type; atypical		5.2E-3
		DOMAIN:RING-type		2.8E-2
	20	AP2	1	2.0E-2
		DNA_BIND:AP2/ERF		3.3E-2
		AP2/ERF domain		4.7E-2
	22	Trehalose biosynthetic process	1	3.5E-2
	23	Cation transport	0.97	1.2E-2
		Potassium ion transport		4.9E-2
	24	Lysosome	0.95	2.7E-2
		Proteolysis involved in cellular protein catabolic process		4.9E-2
	25	GroES-like	0.95	1.5E-2
	26	ACT_SITE:Proton acceptor	0.93	2.4E-4
		S_TKc		1.0E-2
		Protein serine/threonine/tyrosine kinase activity		1.7E-2
		Protein serine/threonine kinase activity		3.1E-2
		Serine/threonine-protein kinase, active site		3.3E-2
	28	Transcription factor activity, sequence-specific DNA binding	0.89	1.9E-3
		Regulation of transcription, DNA-templated		1.9E-2
		Transcription regulatory region sequence-specific DNA binding		3.2E-2
	31	Glutaredoxin-like, plant II	0.82	2.8E-2
	33	Phenylpropanoid biosynthesis	0.8	1.8E-3
	36	Transaminase activity	0.76	1.3E-2
		Aminotransferase		2.3E-2
	40	Growth regulation	0.66	2.8E-2
	41	Detoxification	0.66	4.1E-2
	47	Regulation of cytokinin-activated signaling pathway	0.62	3.4E-2
	49	Biosynthesis of various plant secondary metabolites	0.59	2.0E-2
downregulated	1	Nucleosome core	3.2	1.2E-5
		Nucleosome		2.7E-5
		Chromosome		7.0E-5
		Regulation of nucleobase-containing compound metabolic process		1.3E-4
		Histone-fold		1.9E-4
		Histone core		2.5E-4
		Protein heterodimerization activity		8.7E-4
		DOMAIN:Histone H2A/H2B/H3		6.0E-3
		Structural constituent of chromatin		7.1E-3
		DNA binding		1.7E-2
	2	Hydrolase activity, acting on ester bonds	1.47	4.9E-4
		Lipase, GDSL		4.9E-4
		Lipid catabolic process		1.9E-3
		Lipid degradation		2.4E-3
		Lipid metabolism		2.8E-2
	3	Methylation	1.31	2.2E-3
	4	Ribosome	1.17	1.5E-2
		Structural constituent of ribosome		3.4E-2
		Ribosome		4.8E-2
	5	Magnesium	1.07	2.8E-2
	6	SANT/Myb domain	0.92	8.4E-3
		Homeodomain-like		9.3E-3
		DOMAIN:Myb-like		2.1E-2
		SANT		3.8E-2
	7	Magnesium	0.86	2.8E-2

## Sheet: FX vs BX
FX vs BX
Gene regulation	Cluster	Category	Enrichment Score	P-value
upregulated	1	Oxidoreductase	5.53	2.9E-12
		Iron		4.8E-9
		BINDING:axial binding residue		2.5E-7
		Cytochrome P450, conserved site		3.6E-6
		Heme binding		4.0E-6
		Cytochrome P450, E-class, group I		4.1E-6
		Cytochrome P450		1.3E-5
		Heme		1.4E-5
		Monooxygenase activity		1.5E-5
		Monooxygenase		2.0E-5
		Iron ion binding		2.1E-5
		Oxidoreductase activity, acting on paired donors, with incorporation or reduction of molecular oxygen		3.7E-4
	2	Transmembrane helix	4.89	2.1E-8
		Transmembrane		8.2E-7
		Integral component of membrane		8.9E-5
		TRANSMEM:Helical		1.2E-4
		Membrane		1.9E-3
	3	Non-haem dioxygenase N-terminal domain	2.77	4.0E-4
		Isopenicillin N synthase-like		7.9E-4
		DOMAIN:Fe2OG dioxygenase		1.3E-3
		Oxoglutarate/iron-dependent dioxygenase		1.8E-3
		Dioxygenase activity		1.9E-2
	4	Nitrate assimilation	2.76	1.3E-4
		Nitrate assimilation		3.5E-4
	5	DOMAIN:EamA 1	2.39	1.1E-3
		DOMAIN:EamA 2		1.1E-3
		Transmembrane transporter activity		1.6E-3
		Drug/metabolite transporter		4.0E-3
	6	Amino acid transmembrane transporter activity	1.99	2.5E-3
		DOMAIN:Amino acid transporter transmembrane		9.3E-3
	7	DOMAIN:Alpha/beta hydrolase fold-3	1.98	1.7E-3
		MOTIF:Involved in the stabilization of the negatively charged intermediate by the formation of the oxyanion hole		7.8E-3
	8	Copper ion binding	1.31	3.3E-2
		DOMAIN:Plastocyanin-like		3.8E-2
		Cupredoxin		4.5E-2
	9	START-like domain	1.1	4.1E-2
	10	Potassium ion transport	0.91	4.4E-2
		Potassium transport		1.3E-1
	12	AP2	0.88	4.4E-2
	13	Universal stress protein A	0.86	3.7E-2
	14	CARBOHYD:N-linked (GlcNAc...) asparagine	0.82	1.9E-2
	15	Biosynthesis of various plant secondary metabolites	0.79	6.5E-3
	18	Integral component of plasma membrane	0.67	2.0E-2
		DOMAIN:MtN3/slv 1		4.8E-2
		DOMAIN:MtN3/slv 2		4.8E-2
	19	LIPID:S-farnesyl cysteine	0.65	3.4E-2
	21	Oxylipin biosynthetic process	0.59	2.8E-2
	22	Polysaccharide binding	0.58	1.3E-2
	31	ACT_SITE:Proton acceptor	0.39	5.5E-3
	33	Phenylpropanoid biosynthesis	0.38	3.4E-2
downregulated	1	Cell division	2.56	3.6E-4
		Cell division		5.1E-4
		Cell cycle		3.2E-3
	2	Kinesin, motor region, conserved site	2.34	5.5E-4
		Motor protein		1.0E-3
		DOMAIN:Kinesin motor		1.1E-3
		Microtubule motor activity		1.1E-3
		Kinesin, motor domain		1.2E-3
		KISc		1.3E-3
		Microtubule-based movement		1.5E-3
		Microtubule binding		1.6E-3
		Microtubule		2.5E-3
		Microtubule		9.0E-3
		Motor proteins		4.6E-2
	3	UDP-glucosyltransferase activity	1.96	8.9E-4
		DOMAIN:UDP-glycosyltransferases		1.8E-3
		Myricetin 3-O-glucosyltransferase activity		2.2E-3
		Daphnetin 3-O-glucosyltransferase activity		2.2E-3
		Flavonol 3-O-glucosyltransferase activity		2.6E-3
		ACT_SITE:Charge relay		8.3E-3
		UDP-glucuronosyl/UDP-glucosyltransferase		1.0E-2
		UDP-glycosyltransferase activity		1.5E-2
	4	Cyclin	1.53	8.6E-3
		SM01332		1.8E-2
		Cyclin, C-terminal domain		2.0E-2
		Cyclin, A/B/D/E types		2.1E-2
		Mitotic cell cycle phase transition		2.3E-2
		Cyclin, N-terminal		3.6E-2
		Cyclin-dependent protein serine/threonine kinase regulator activity		3.9E-2
		Regulation of cyclin-dependent protein serine/threonine kinase activity		4.5E-2
		CYCLIN		4.7E-2
	5	Flavonoid biosynthesis	1.44	1.2E-2
		Response to UV-B		1.4E-2
		Flavonoid biosynthetic process		4.7E-2
	7	PROPEP:Removed in mature form	1.08	2.0E-2
		Plastocyanin-like		3.6E-2
		DOMAIN:Phytocyanin		3.7E-2
	8	Oxidoreductase activity, acting on paired donors, with incorporation or reduction of molecular oxygen	0.89	2.7E-2
		Iron ion binding		4.0E-2
	9	DOMAIN:Myb-like	0.81	1.6E-2
		SANT		2.8E-2
		DOMAIN:HTH myb-type 1		3.2E-2
		DOMAIN:HTH myb-type 2		3.2E-2
		SANT/Myb domain		3.5E-2

## Sheet: FA vs BA
FA vs BA
Gene regulation	Cluster	Category	Enrichment Score	P-value
upregulated	1	Response to heat	1.79	1.6E-3
		Chaperone		4.6E-3
		Protein processing in endoplasmic reticulum		3.9E-2
	2	DnaJ	1.44	2.6E-2
		DOMAIN:J		4.0E-2
		DnaJ domain		4.7E-2
	3	Response to heat	0.45	1.6E-3
	5	Plant-type cell wall	0.41	4.5E-2
downregulated	1	Glycosidase	2.17	6.0E-4
		Starch and sucrose metabolism		3.7E-3
		ACT_SITE:Proton donor		4.4E-3
		Glycoside hydrolase, superfamily		1.2E-2
		Carbohydrate metabolic process		1.5E-2
	2	DOMAIN:NAC	2.16	5.9E-4
		No apical meristem (NAM) protein		7.6E-4
	3	Transcription factor activity, sequence-specific DNA binding	1.47	3.7E-3
		Regulation of transcription, DNA-templated		6.4E-3
		Transcription		2.0E-2
		Transcription regulation		2.6E-2
	4	Glycoside hydrolase, superfamily	1.42	1.2E-2
		Polysaccharide catabolic process		1.5E-2
	5	Protein dimerization activity	1.39	2.1E-3
		DOMAIN:BHLH		4.6E-2
	6	Oxidoreductase activity	1.23	1.4E-2
		Iron		2.3E-2
		Non-haem dioxygenase N-terminal domain		2.5E-2
		Isopenicillin N synthase-like		3.2E-2
		DOMAIN:Fe2OG dioxygenase		3.8E-2
		Oxoglutarate/iron-dependent dioxygenase		4.3E-2
	7	Signal	1.12	2.4E-2
		CARBOHYD:N-linked (GlcNAc...) asparagine		3.6E-2
	8	RNA polymerase II core promoter proximal region sequence-specific DNA binding	0.97	2.6E-2
	1	Iron	0.64	2.3E-2

## Sheet: CmX vs CmA
CmX vs CmA
Gene regulation	Cluster	Category	Enrichment Score	P-value
upregulated	no	no	no	no
downregulated	1	Metabolic pathways	0.7	4.9E-2
	3	Kinase activity	0.49	4.5E-2

## Sheet: CsX vs CsA
CsX vs CsA
Gene regulation	Cluster	Category	Enrichment Score	P-value
upregulated	1	Nucleus	8.98	1.5E-11
		DNA binding		1.5E-10
		DNA-binding		5.0E-7
	2	DNA replication	6.89	5.8E-21
		DNA replication		5.9E-16
		DNA replication initiation		3.1E-13
		Mini-chromosome maintenance, conserved site		1.1E-8
		DOMAIN:MCM		4.6E-8
		MOTIF:Arginine finger		4.6E-8
		Mini-chromosome maintenance, DNA-dependent ATPase		4.9E-8
		DNA unwinding involved in DNA replication		5.1E-8
		MCM complex		1.4E-7
		Single-stranded DNA binding		2.1E-7
		MCM		2.1E-7
		Double-strand break repair via break-induced replication		4.2E-7
		THO complex		6.5E-7
		Cell cycle		6.4E-5
		Nucleic acid-binding, OB-fold		1.4E-4
		DNA helicase activity		1.7E-4
		ATPase activity		2.8E-4
		DNA strand elongation involved in DNA replication		3.0E-4
		DNA duplex unwinding		3.0E-4
		ZN_FING:C4-type		2.9E-3
		Helicase		1.5E-2
	3	Chromosome	6.05	7.5E-11
		Nucleosome		1.1E-9
		Structural constituent of chromatin		4.3E-9
		Nucleosome core		1.3E-8
		Histone core		5.1E-8
		DOMAIN:Histone H2A/H2B/H3		7.5E-8
		Histone-fold		4.7E-7
		Protein heterodimerization activity		1.7E-6
		DOMAIN:Histone H2A C-terminal		2.8E-5
		Histone H2A		3.8E-5
		H2A		1.1E-4
		Heterochromatin assembly		4.3E-4
	4	P-loop containing nucleoside triphosphate hydrolase	3.21	3.5E-5
		ATPase activity		2.8E-4
		ATP binding		1.2E-3
		ATP-binding		2.1E-3
		Nucleotide-binding		3.8E-3
	5	P-loop containing nucleoside triphosphate hydrolase	2.67	3.5E-5
		AAA+ ATPase domain		7.7E-3
		AAA		3.7E-2
	6	High mobility group (HMG) box domain	1.57	3.1E-3
		HMG		6.4E-3
	7	CROSSLNK:Glycyl lysine isopeptide (Lys-Gly) (interchain with G-Cter in ubiquitin)	1.57	1.4E-2
		Nucleosome assembly		2.0E-2
		Ubl conjugation		2.4E-2
	8	Phragmoplast	1.49	2.2E-3
		Microtubule binding		3.3E-3
		Motor protein		4.2E-3
		DOMAIN:Kinesin motor		4.4E-2
		Kinesin, motor domain		4.6E-2
	9	ZN_FING:PHD-type	1.14	2.7E-2
		Zinc finger, PHD-type		3.6E-2
		Zinc finger, PHD-finger		4.6E-2
	10	Zinc-finger	1.14	7.4E-4
downregulated	1	CARBOHYD:N-linked (GlcNAc...) asparagine	3.27	3.9E-7
		Signal		3.8E-3
		Extracellular region		6.0E-3
		Glycoprotein		8.9E-3
	2	ACT_SITE:Proton donor	2.1	6.5E-4
		Glycoside hydrolase, superfamily		6.9E-4
	3	Iron	2.06	1.7E-3
		Oxidoreductase		1.7E-3
		BINDING:axial binding residue		2.1E-3
		Cytochrome P450, conserved site		3.2E-3
		Cytochrome P450, E-class, group I		3.4E-3
		Heme binding		4.6E-3
		Cytochrome P450		6.6E-3
		Heme		1.0E-2
		Iron ion binding		1.9E-2
		Oxidoreductase activity, acting on paired donors, with incorporation or reduction of molecular oxygen, NAD(P)H as one donor, and incorporation of one atom of oxygen		3.4E-2
		Monooxygenase activity		3.9E-2
		Monooxygenase		4.7E-2
	4	Sequence-specific DNA binding	1.91	3.5E-5
		Transcription factor activity, sequence-specific DNA binding		8.9E-5
		Transcription regulatory region sequence-specific DNA binding		1.3E-4
		Regulation of transcription, DNA-templated		6.3E-3
	5	WRKY	1.69	1.5E-2
		DNA_BIND:WRKY		1.6E-2
		DNA-binding WRKY		1.8E-2
		DOMAIN:WRKY		4.0E-2
	6	REPEAT:LRR 17	1.64	6.9E-3
		Leucine-rich repeat		7.3E-3
		REPEAT:LRR 18		7.6E-3
		Leucine-rich repeat		7.8E-3
		REPEAT:LRR 28		8.2E-3
		REPEAT:LRR 16		1.0E-2
		LRR_TYP		1.0E-2
		REPEAT:LRR 30		1.0E-2
		REPEAT:LRR 15		1.1E-2
		Leucine-rich repeat, typical subtype		1.2E-2
		REPEAT:LRR 9		1.4E-2
		REPEAT:LRR 14		1.5E-2
		REPEAT:LRR 19		1.7E-2
		REPEAT:LRR 11		1.8E-2
		REPEAT:LRR 8		1.9E-2
		REPEAT:LRR 29		2.0E-2
		Leucine-rich repeat-containing N-terminal, type 2		2.0E-2
		REPEAT:LRR 27		2.0E-2
		REPEAT:LRR 22		2.2E-2
		REPEAT:LRR 24		2.3E-2
		REPEAT:LRR 12		2.5E-2
		REPEAT:LRR 4		3.0E-2
		REPEAT:LRR 21		3.5E-2
		REPEAT:LRR 7		3.9E-2
		REPEAT:LRR 26		4.1E-2
		REPEAT:LRR 23		4.4E-2
		REPEAT:LRR 10		4.8E-2
		REPEAT:LRR 13		4.8E-2
		REPEAT:LRR 20		4.8E-2
	7	Non-haem dioxygenase N-terminal domain	1.64	5.2E-3
		Isopenicillin N synthase-like		8.6E-3
		DOMAIN:Fe2OG dioxygenase		1.4E-2
		Oxoglutarate/iron-dependent dioxygenase		1.6E-2
	8	Transmembrane helix	1.54	3.1E-3
		Transmembrane		5.0E-3
		TRANSMEM:Helical		3.8E-2
	9	TOPO_DOM:Extracellular	1.45	6.5E-6
		ACT_SITE:Proton acceptor		1.5E-4
		Serine/threonine-protein kinase, active site		3.7E-3
		S_TKc		4.6E-3
		Protein kinase, ATP binding site		1.0E-2
		Protein serine/threonine/tyrosine kinase activity		1.7E-2
		Protein serine/threonine kinase activity		1.7E-2
		Serine/threonine-protein kinase		2.7E-2
		Receptor		4.2E-2
	10	Carotenoid biosynthesis	1.42	3.0E-2
		Abscisic acid biosynthesis		4.0E-2
		Abscisic acid biosynthetic process		4.6E-2
	11	Abscisic acid binding	1.32	7.1E-3
		SITE:Involved in interactions with PP2Cs		3.1E-2
		MOTIF:Gate loop		3.1E-2
		MOTIF:Latch loop		3.1E-2
		REGION:START-like		3.1E-2
		START-like domain		3.4E-2
		Polyketide cyclase/dehydrase		4.3E-2
	12	Oxylipin biosynthetic process	1.31	4.3E-4
		Oxylipin biosynthesis		9.0E-3
		Fatty acid metabolism		4.0E-2
	13	SCF ubiquitin ligase complex	1.28	2.5E-2
		LRR_CC		5.0E-2
	15	Proteolysis involved in cellular protein catabolic process	1.11	4.1E-2
	16	START-like domain	1.11	3.4E-2
	17	DOMAIN:Cupin type-1 1	1.03	7.9E-3
		DOMAIN:Cupin type-1 2		7.9E-3
	18	Ethylene-activated signaling pathway	0.98	8.7E-3
	19	ACT_SITE:Charge relay	0.98	7.2E-3
		UDP-glucosyltransferase activity		1.9E-2
	20	Amino acid transmembrane transporter activity	0.97	4.0E-2
	22	Fructose 6-phosphate metabolic process	0.85	4.1E-2
	23	DNA_BIND:Homeobox	0.83	4.0E-2
	24	Biosynthesis of various plant secondary metabolites	0.82	2.5E-2
	27	DOMAIN:EGF-like	0.73	1.1E-2
		REGION:CaM-binding		1.6E-2
	31	Symport	0.64	1.5E-2

## Sheet: CsX vs CmX
CsX vs CmX
Gene regulation	Cluster	Category	Enrichment Score	P-value
upregulated	1	Drug transmembrane export	1.51	1.8E-2
		Multi antimicrobial extrusion protein		2.9E-2
		Xenobiotic transporter activity		3.5E-2
	2	REPEAT:9	1.3	1.0E-2
		REPEAT:8		1.3E-2
		REPEAT:7		2.2E-2
		REPEAT:6		3.7E-2
		REPEAT:5		4.8E-2
	3	Fatty acid biosynthesis	1.24	1.4E-2
		Lipid biosynthesis		3.2E-2
		Lipid metabolism		4.1E-2
	4	DOMAIN:Thioredoxin	1.19	8.6E-3
		Thioredoxin domain		1.2E-2
		Thioredoxin, conserved site		2.9E-2
	5	Kinesin, motor region, conserved site	1.07	2.3E-2
		DOMAIN:Kinesin motor		3.5E-2
		Microtubule cytoskeleton organization		4.1E-2
		KISc		4.3E-2
		Kinesin, motor domain		4.4E-2
	6	DOMAIN:NAD-dependent epimerase/dehydratase	1.04	2.6E-2
		NAD-dependent epimerase/dehydratase		4.2E-2
	7	TRANSMEM:Helical; Name=13	1	1.8E-2
		TRANSMEM:Helical; Name=10		4.7E-2
	9	Iron ion binding	0.99	4.5E-2
		Heme binding		4.9E-2
		Cytochrome P450, E-class, group I		4.9E-2
	10	DOMAIN:Tryptophan synthase beta chain-like PALP	0.98	3.2E-2
	11	SITE:Transition state stabilizer	0.97	3.9E-2
		DOMAIN:Plant heme peroxidase family profile		4.0E-2
	12	SNF2-related	0.96	1.0E-2
		DNA-dependent ATPase activity		3.1E-2
	14	Response to endoplasmic reticulum stress	0.94	1.1E-2
	15	Carbohydrate metabolic process	0.91	3.9E-2
	16	Chloroplast stroma	0.85	2.5E-2
	17	Proteolysis involved in cellular protein catabolic process	0.85	3.2E-2
	18	CARBOHYD:N-linked (GlcNAc...) asparagine	0.83	7.5E-4
	36	ACT_SITE:Proton acceptor	0.46	3.1E-4
	37	P-loop containing nucleoside triphosphate hydrolase	0.43	3.7E-2
downregulated	1	ATPase activity	2.39	1.6E-4
		AAA+ ATPase domain		7.2E-3
		P-loop containing nucleoside triphosphate hydrolase		7.6E-3
		AAA		3.0E-2
	2	ATP binding	2.39	2.2E-4
		ATP-binding		6.3E-3
		Nucleotide-binding		4.8E-2
	3	TOPO_DOM:Extracellular	1.88	1.4E-4
		TOPO_DOM:Cytoplasmic		1.1E-3
		CARBOHYD:N-linked (GlcNAc...) asparagine		1.3E-2
	4	ACT_SITE:Proton acceptor	1.84	4.2E-6
		ATP binding		2.2E-4
		Serine/threonine-protein kinase		3.0E-3
		Serine/threonine-protein kinase, active site		4.7E-3
		Receptor		5.4E-3
		Protein serine/threonine/tyrosine kinase activity		6.8E-3
		Protein kinase, ATP binding site		7.4E-3
		Protein serine/threonine kinase activity		1.3E-2
		DOMAIN:Protein kinase		2.0E-2
		Protein kinase, catalytic domain		3.8E-2
		Protein kinase-like domain		3.9E-2
		Protein phosphorylation		4.4E-2
	5	Nuclear import signal receptor activity	1.78	7.6E-3
		Nuclear localization sequence binding		7.6E-3
		Protein import into nucleus		1.4E-2
	6	DOMAIN:Cation-transporting P-type ATPase N-terminal	1.3	6.2E-3
		Cation-transporting ATPase activity		6.5E-3
		Calcium-transporting P-type ATPase, subfamily IIB		1.6E-2
		Cation-transporting P-type ATPase, N-terminal		1.7E-2
		REGION:Interaction with calmodulin		2.1E-2
		SM00831		2.3E-2
		Cation-transporting P-type ATPase, C-terminal		3.6E-2
		Integral component of plasma membrane		4.8E-2
	7	Sensory transduction	1.28	3.2E-3
		PAS fold		2.0E-2
		DOMAIN:PAS		3.6E-2
		PAS		4.5E-2
		PAS domain		4.5E-2
	8	Leucine-rich repeat, typical subtype	1.23	1.0E-2
		REPEAT:LRR 7		1.2E-2
		REPEAT:LRR 4		1.9E-2
		REPEAT:LRR 1		2.4E-2
		REPEAT:LRR 2		2.4E-2
		REPEAT:LRR 21		2.9E-2
		LRR_TYP		3.2E-2
		REPEAT:LRR 3		3.4E-2
		Leucine-rich repeat		3.9E-2
		Leucine-rich repeat-containing N-terminal, type 2		3.9E-2
		REPEAT:LRR 6		4.4E-2
		REPEAT:LRR 19		4.6E-2
	9	DOMAIN:Amino acid transporter transmembrane	1.1	4.0E-2
		Amino acid transmembrane transporter activity		4.3E-2
	10	Chloroplast stroma	1.05	5.4E-3
		TRANSIT:Chloroplast		4.0E-2
	11	DOMAIN:BAH	1.02	4.5E-2
	12	DOMAIN:Rx N-terminal	0.95	1.7E-3
	13	Virus induced gene silencing	0.94	1.5E-2
	14	DNA-directed RNA polymerase I complex	0.91	5.0E-2
	15	ATPase, AAA-type, core	0.91	3.6E-2
	16	ACT_SITE:Charge relay	0.88	6.2E-3
		UDP-glucosyltransferase activity		2.0E-2
	17	Protein phosphatase	0.79	4.0E-2
	19	Zinc finger, PHD-finger	0.77	1.0E-2
	25	Helix-turn-helix motif	0.67	5.0E-2
	26	Ubiquitin-dependent protein catabolic process	0.65	4.5E-2
	27	S-adenosylmethionine-dependent methyltransferase activity	0.64	5.0E-2
	28	Protein phosphatase	0.63	4.0E-2

## Sheet: CsA vs CmA
CsA vs CmA
Gene regulation	Cluster	Category	Enrichment Score	P-value
upregulated	1	Fatty acid biosynthesis	1.51	1.0E-2
		Fatty acid biosynthetic process		1.0E-2
		Lipid biosynthesis		2.1E-2
		Fatty acid metabolism		3.7E-2
		Lipid metabolism		4.3E-2
	2	Drug transmembrane export	1.48	1.5E-2
		Multi antimicrobial extrusion protein		2.6E-2
		Transmembrane transporter activity		2.6E-2
		Xenobiotic transporter activity		3.1E-2
	3	TRANSMEM:Helical; Name=10	1.44	1.3E-2
		TRANSMEM:Helical; Name=13		1.7E-2
		TRANSMEM:Helical; Name=5		1.9E-2
		TRANSMEM:Helical; Name=4		2.3E-2
		TRANSMEM:Helical; Name=1		2.4E-2
		TRANSMEM:Helical; Name=2		2.4E-2
		TRANSMEM:Helical; Name=11		2.8E-2
		TRANSMEM:Helical; Name=9		2.9E-2
		TRANSMEM:Helical; Name=6		3.2E-2
		TRANSMEM:Helical; Name=8		3.4E-2
		TRANSMEM:Helical; Name=3		3.4E-2
	4	PROPEP:Activation peptide	1.42	1.4E-2
		ACT_SITE:Charge relay system		1.6E-2
		DOMAIN:Subtilisin-like protease fibronectin type-III		1.8E-2
		DOMAIN:Inhibitor I9		1.9E-2
		DOMAIN:Peptidase S8		2.1E-2
		Proteinase inhibitor I9		2.3E-2
		Peptidase S8, subtilisin-related		2.4E-2
		Peptidase S8, subtilisin, Ser-active site		2.6E-2
		Peptidase S8/S53 domain		2.6E-2
		DOMAIN:Peptidase S8/S53		2.7E-2
		DOMAIN:PA		2.9E-2
		Protease-associated domain, PA		3.4E-2
	5	DOMAIN:Band 7	1.41	3.1E-2
		PHB		3.9E-2
		Band 7 protein		4.8E-2
	6	REPEAT:TPR 1	1.14	1.8E-2
		REPEAT:TPR 2		1.8E-2
		REPEAT:TPR 3		4.2E-2
	7	Multicopper oxidase, copper-binding site	1.14	5.0E-3
		Multicopper oxidase, type 3		4.4E-2
		Multicopper oxidase, type 1		4.7E-2
		Multicopper oxidase, type 2		4.7E-2
	8	DOMAIN:ABC transporter	1.12	1.4E-2
		DOMAIN:ABC transporter 1		2.7E-2
		DOMAIN:ABC transporter 2		2.7E-2
		DOMAIN:ABC transmembrane type-2 1		3.1E-2
		DOMAIN:ABC transmembrane type-2 2		3.1E-2
		ABC transporter-like		3.3E-2
		Plant PDR ABC transporter associated		3.4E-2
	9	P-loop containing nucleoside triphosphate hydrolase	1.12	1.5E-2
	10	Cell division	1.07	4.1E-2
	11	Transit peptide	1.03	1.5E-2
		Chloroplast stroma		3.6E-2
	12	DOMAIN:NAD-dependent epimerase/dehydratase	0.96	2.5E-2
		NAD-dependent epimerase/dehydratase		3.9E-2
	13	DOMAIN:Thioredoxin	0.91	3.0E-2
		Thioredoxin domain		3.6E-2
	14	Microtubule cytoskeleton organization	0.84	3.6E-2
	17	Chloroplast thylakoid	0.7	3.1E-2
	34	CARBOHYD:N-linked (GlcNAc...) asparagine	0.32	4.4E-2
	36	ACT_SITE:Proton acceptor	0.27	1.4E-2
downregulated	1	ATPase activity	2.33	8.9E-4
		AAA+ ATPase domain		1.2E-3
		AAA		3.5E-3
	2	Glycoside hydrolase, family 14	1.91	3.0E-3
		Beta-amylase activity		3.4E-3
		Polysaccharide degradation		1.3E-2
		Glycoside hydrolase, family 14B, plant		1.6E-2
		Glycoside hydrolase, family 14, conserved site		1.6E-2
	3	Amino acid transmembrane transporter activity	1.86	1.6E-3
		DOMAIN:Amino acid transporter transmembrane		1.1E-2
		Amino acid transporter, transmembrane		2.1E-2
		Amino acid transport		2.9E-2
		Amino-acid transport		4.7E-2
	4	Glycoside hydrolase, superfamily	1.82	6.4E-4
		Glycosidase		3.6E-2
	5	ATP binding	1.72	5.6E-3
		ATP-binding		1.2E-2
	6	Glycerol metabolic process	1.69	7.1E-3
		Glycerolipid metabolism		2.5E-2
		Glycerol metabolism		4.9E-2
	7	Phototropism	1.55	3.2E-4
	8	ACT_SITE:Charge relay	1.55	4.4E-4
		UDP-glucosyltransferase activity		2.6E-3
		Flavonol 3-O-glucosyltransferase activity		6.4E-3
		Flavonol 7-O-beta-glucosyltransferase activity		1.8E-2
		DOMAIN:UDP-glycosyltransferases		4.1E-2
		Daphnetin 3-O-glucosyltransferase activity		4.9E-2
		Myricetin 3-O-glucosyltransferase activity		4.9E-2
		Quercetin 7-O-glucosyltransferase activity		4.9E-2
	9	Glycoside hydrolase, family 35, conserved site	1.51	2.4E-3
		Glycoside hydrolase, family 35		5.4E-3
		Beta-galactosidase activity		1.2E-2
	10	Aldo/keto reductase subgroup	1.48	1.7E-2
		DOMAIN:NADP-dependent oxidoreductase		2.8E-2
		NADP-dependent oxidoreductase domain		3.9E-2
		D-threo-aldose 1-dehydrogenase activity		4.4E-2
		Aldo-keto reductase (NADP) activity		4.9E-2
	11	Sensory transduction	1.46	3.3E-3
		PAS fold		5.6E-3
		PAS		1.5E-2
		DOMAIN:PAS		1.5E-2
		PAS domain		2.0E-2
	12	ATPase, AAA-type, core	1.43	9.7E-3
	13	ACT_SITE:Proton acceptor	1.43	3.7E-5
		ATP binding		5.6E-3
		Serine/threonine-protein kinase, active site		7.5E-3
		Serine/threonine-protein kinase		1.7E-2
		Protein serine/threonine/tyrosine kinase activity		1.9E-2
		Protein kinase, ATP binding site		3.9E-2
		Protein serine/threonine kinase activity		4.0E-2
	14	Chaperonin ClpA/B	1.41	3.0E-3
		REGION:II		1.6E-2
		Chaperonin ClpA/B, conserved site		1.6E-2
		REGION:I		2.1E-2
		Clp ATPase, C-terminal		4.5E-2
	15	Raffinose synthase	1.36	1.1E-2
		Galactinol-sucrose galactosyltransferase activity		1.2E-2
	16	Symport	1.32	2.3E-6
		General substrate transporter		1.2E-2
		Sugar transporter, conserved site		1.4E-2
		Monosaccharide transmembrane transporter activity		1.9E-2
		DOMAIN:Major facilitator superfamily (MFS) profile		2.5E-2
		TRANSMEM:Helical; Name=12		3.4E-2
		Carbohydrate transmembrane transporter activity		4.6E-2
	17	Cytochrome b245, heavy chain	1.21	1.4E-2
		DOMAIN:Ferric oxidoreductase		2.1E-2
		FAD-binding 8		2.3E-2
		Ferric reductase, NAD binding		2.3E-2
		Ferric reductase transmembrane component-like domain		2.3E-2
		Ferric-chelate reductase activity		4.0E-2
	18	Sulfate transmembrane transporter activity	1.18	2.2E-2
	19	Homeodomain-like	1.18	1.6E-2
	20	Cation-transporting ATPase activity	1.17	3.5E-3
		DOMAIN:Cation-transporting P-type ATPase N-terminal		2.8E-2
		Calcium transport		4.3E-2
		HAD-like domain		4.3E-2
		Calcium-transporting P-type ATPase, subfamily IIB		4.5E-2
	21	Transcription regulatory region sequence-specific DNA binding	1.16	2.1E-3
		Transcription factor activity, sequence-specific DNA binding		1.4E-2
		Regulation of transcription, DNA-templated		2.8E-2
	22	DNA_BIND:Homeobox	1.16	1.3E-2
		Homeobox		2.4E-2
	23	DOMAIN:HMA	1.13	1.8E-3
		LIPID:S-farnesyl cysteine		1.4E-2
		Heavy metal-associated domain, HMA		2.0E-2
	24	CARBOHYD:N-linked (GlcNAc...) asparagine	1.11	4.5E-4
	25	ABC transporter-like		2.5E-2
		DOMAIN:ABC transporter		2.6E-2
		ABC transporters		2.9E-2
	26	Nuclear localization sequence binding	1.11	3.0E-2
		Nuclear import signal receptor activity		3.0E-2
	28	DOMAIN:Piwi	0.93	4.3E-2
		Domain of unknown function DUF1785		4.5E-2
		Stem cell self-renewal protein Piwi		4.5E-2
		Virus induced gene silencing		4.8E-2
	29	Epoxide hydrolase-like	0.93	2.3E-2
	32	Kinesin, motor region, conserved site	0.88	3.6E-2
	34	RNA polymerase II transcription factor activity, sequence-specific DNA binding	0.78	3.1E-2
	35	Potassium ion import across plasma membrane	0.76	3.3E-3
	36	Negative regulation of transcription from RNA polymerase II promoter	0.76	2.6E-2
		MOTIF:Responsive for interaction with TGA factors		4.3E-2
	37	Biosynthesis of various plant secondary metabolites	0.75	3.2E-2
	38	DOMAIN:Rx N-terminal	0.7	8.5E-3
	43	BINDING:axial binding residue	0.66	2.3E-2
	45	Protein kinase inhibitor activity	0.63	3.9E-2
	48	Alpha-Linolenic acid metabolism	0.61	1.5E-2
	49	Chloroplast stroma	0.61	3.7E-2
